# Supplementary material for: The Use of High Surface Area Mesoporous-Activated Carbon from Longan Seed Biomass for Increasing Capacity and Kinetics of Methylene Blue Adsorption from Aqueous Solution
Source: MDPI journal article supplement (doi:10.3390/molecules26216521), 2021-10-28
Supplement: s1 [file s1]

# The Use of High Surface Area Mesoporous-Activated Carbon from Longan Seed Biomass for Increasing Capacity and Kinetics of Methylene Blue Adsorption from Aqueous Solution

Panuwat Lawtae and Chaiyot Tangsathitkulchai \*

Institute of Engineering, School of Chemical Engineering, Suranaree University of Technology, Muang District, Nakhon Ratchasima 30000, Thailand; pnwlawtae@gmail.com

\* Correspondence: chaiyot@sut.ac.th

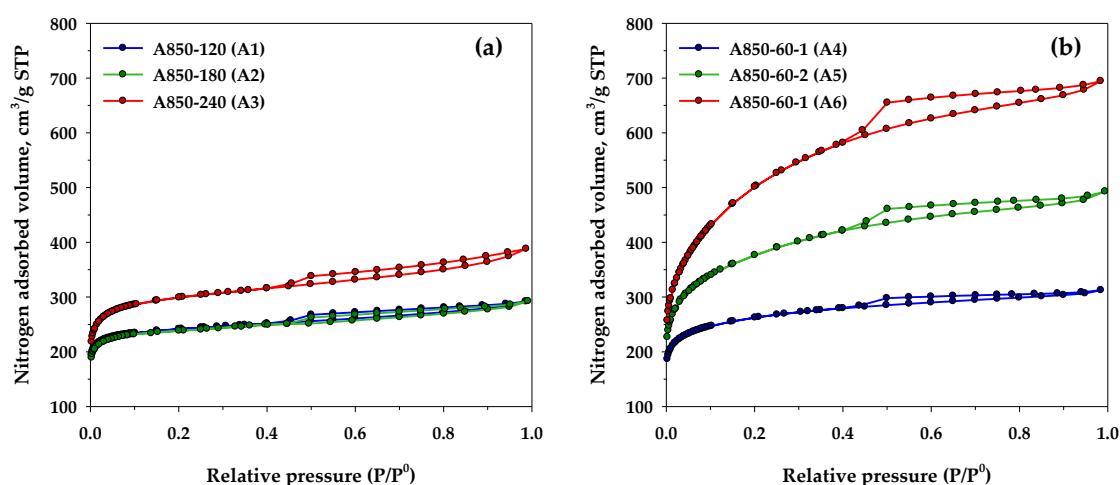

**Figure S1.** Nitrogen adsorption isotherms of (a) microporous activated carbon prepared by the two-step activation method and (b) mesoporous activated carbon prepared by the OTA method.

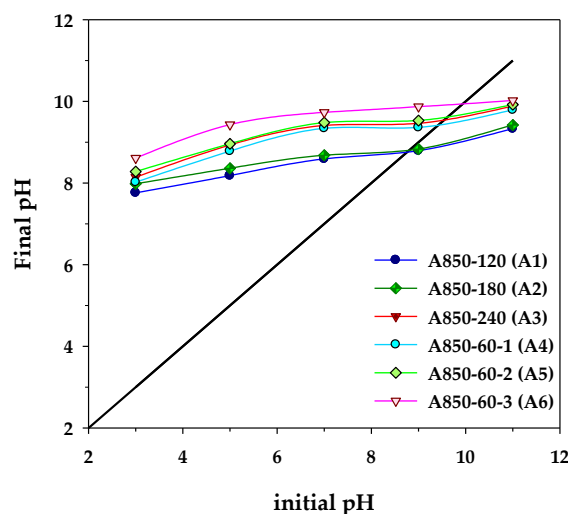

**Figure S2.** The determination of pH<sub>PZC</sub> of activated carbon from the intersection between the curve of pH<sub>initial</sub> vs pH<sub>final</sub> and the straight line of pH<sub>initial</sub> = pH<sub>final</sub>.
